# Supplementary material for: Mechanistic insight for T-cell exclusion by cancer-associated fibroblasts in human lung cancer
Source: eLife. 2025 Apr 10;13:RP101885. doi: 10.7554/eLife.101885 (PMC11984955; doi:10.7554/eLife.101885)
Supplement: Table 1—source data 1. [file elife-101885-table1-data1.xlsx]

## Sheet: LUAD
Subtypes	Stroma area (mm2)	Tumor area (mm2)	ADH1B area (mm2)	Total FAP area (mm2)	FAP+asMA+ area (mm2)	Total aSMA+ area (mm2)	Stromal CD8 per mm2	Tumoral CD8 per mm2	Stroma : CD3+ per mm2	Tumoral islets : CD3+ per mm2
LUAD	28.33	12.85	4.04	0.1	0.019	1.34	497.636	508.249	2294	887
LUAD	2.79	1.57	0.27	0.09	0.03	0.34	246.508	167.329	1201	766
LUAD	34.26	12.89	9.57	0.008	0.0002	1.24	465.09	190.846	958	917
LUAD	3.39	3.63	0.033	0.3	0.09	0.4	941.003	215.978	884	581
LUAD	89.33	114.02	0.14	28.16	8.08	15.07	432.318	157.771	2516	994
LUAD	22.12	10.36	2.62	0.1	0.006	0.65	1341.09	239.672	3764	746
LUAD	18.79	11.2	13.94	0.09	0.05	2.77	625.677	130.045	2151	357
LUAD	44.06	37.31	8.1	0.48	0.07	5.25	435.526	168.909	1191	241
LUAD	17.62	15.41	3.16	0.13	0.03	1.15	1199.66	686.623	3510	1202
LUAD	33.68	18.25	8.04	0.04	0.008	1.79	140.517	25.7	718	97
LUAD	9.56	19.11	1.08	0.026	0.005	1.36	502.197	150.602	3351	573
LUAD	10.08	31.49	1.46	0.71	0.19	1.46	945.635	720.038	3654	959
LUAD	1.39	1.42	0.07	0.013	0.0005	0.017	864.748	529.577	2376	1981
LUAD	38.12	38.28	5.03	0.15	0.04	4.27	161.668	17.3197	1449	203
LUAD	54.54	39.93	8.38	9.88	2.13	7.38	734.758	186.258	3609	646
LUAD	8.9	9.7	0.46	0.06	0.01	0.54	2044	508.754	5581	1686
LUAD	5.8	13.77	0.96	0.007	0.001	0.35	697.409	247.858	1101	297
LUAD	5.03	8.8	0.92	0.12	0.01	0.42	323.188	68.6364	1298	659
LUAD	12.97	7.19	1.73	1.97	aSMA not done	aSMA not done	284.6	66.7594	713	313
LUAD	52.3	26.3	10.87	0.39	0.06	2	530.522	209.205	2332	509
LUAD	26.57	30.08	6.53	1.97	1.12	8.94	803.682	279.658	2628	817
LUAD	20.23	24.58	2.29	1.84	0.37	2.83	208.997	59.3572	1057	197

## Sheet: LUSC
Subtypes	Stroma area (mm2)	Tumor area (mm2)	ADH1B area (mm2)	Total FAP area (mm2)	FAP+asMA+ area (mm2)	Total aSMA+ area (mm2)	Stromal CD8 per mm2	Tumoral CD8 per mm2	Stroma : CD3+ per mm2	Tumoral islets : CD3+ per mm2
LUSC	58.42	40.16	0.57	15.18	8.37	17.34	889.65	63.97	2088	216
LUSC	37.5	28.36	0.55	3.32	1.5	6.42	546.494	24.6914	2152	223
LUSC	18.72	30.15	0.55	1.66	0.4	2.37	400.641	73.068	881	326
LUSC	82.8	52.62	1.68	2.35	0.93	10.7	852.897	483.694	1764	405
LUSC	22.63	28.85	0.52	4.12	1.97	5.03	1140.15	420.312	2214	824
LUSC	8.81	11.59	0.23	2.48	0.68	1.54	1064.36	93.6152	2902	226
LUSC	42.61	50.59	0.07	12.01	5.48	9.84	647.137	707.373	1090	1012
LUSC	21.6	56.42	0.05	8.02	1.23	2.31	95.0188	18.9117	258	54
LUSC	39.03	68.93	0.08	10.03	2.77	5.97	191.953	28.6813	758	181
LUSC	12.29	20	0.62	2.58	0.19	0.4	1585.75	775.174	3376	1299
LUSC	34.96	43.32	0.18	6.81	1.57	3.58	1550.07	670.314	3490	1849
LUSC	34.39	33.51	3.08	8.58	4.04	9.06	157.806	28.499	578	65
LUSC	33.44	38.98	0.41	17.88	9.26	11.64	234.131	115.418	1624	147
